# Supplementary material for: A sensitive and reproducible qRT-PCR assay detects physiological relevant trace levels of FMR1 mRNA in individuals with Fragile X syndrome
Source: PubMed Central journal article supplement (PMC9992378; doi:10.1038/s41598-023-29786-4), 2023-03-07
Supplement: 41598_2023_29786_MOESM1_ESM.pdf [file 41598_2023_29786_MOESM1_ESM.pdf]

**A sensitive and reproducible qRT-PCR assay detects physiological relevant trace levels of *FMR1* mRNA in individuals with Fragile X Syndrome**

Devan Straub<sup>1</sup>, Lauren M. Schmitt<sup>2,3</sup>, Anna E. Boggs<sup>1</sup>, Paul S. Horn<sup>3,5</sup>, Kelli C. Dominick<sup>1,4</sup>, Christina Gross<sup>3,5</sup>, and Craig A. Erickson<sup>1,4\*</sup>

**Supplemental Table 1.** Detailed Mosaicism Data for Participants with Size and/or Methylation Mosaicism

| Subject | Sex | Size                              | Methylation                                                                                                                                                                                                                                        |
|---------|-----|-----------------------------------|----------------------------------------------------------------------------------------------------------------------------------------------------------------------------------------------------------------------------------------------------|
| 1       | M   | 129, >200 repeats                 | 10 kb and additional bands of 3 and 3.2 kb; Premutation is unmethylated                                                                                                                                                                            |
| 2       | M   | 47, >200 repeats                  |                                                                                                                                                                                                                                                    |
| 3       | M   | 200, > 200 repeats                |                                                                                                                                                                                                                                                    |
| 4       | M   | 200, > 200 repeats                |                                                                                                                                                                                                                                                    |
| 5       | F   | 40 and 128, 162, and >200 repeats |                                                                                                                                                                                                                                                    |
| 6       | M   | 76, >200 repeats                  |                                                                                                                                                                                                                                                    |
| 7       | F   | 30, 165 and >200 repeats          | 5.2 kb and 2.8 kb and additional bands of 5.7 and a smear of 8-9 kb                                                                                                                                                                                |
| 8       | F   |                                   | 5.2 kb and 2.8 kb and additional bands of 6-6.5 kb and 3.6 kb                                                                                                                                                                                      |
| 9       | F   | 30, >200 repeats                  |                                                                                                                                                                                                                                                    |
| 10      | M   |                                   | Fragile X amplification mutation in the form of a fully methylated full mutation, and with mosaicism for an allele that is not detected on PCR and thus probably represents a deleted allele from the expanded allele with the primer site deleted |
| 11      | F   | 30, 134 and >200 repeats          | 5.2 kb and 2.8 kb and a smear of 3.1, 3.3 and 3.6 kb; UM FM, Premutation is methylated on the inactive X chromosome                                                                                                                                |
| 12      | M   | 46, 95 and >200 repeats           | 6, 7 and 8 kb and additional band of 2.9 kb; FM FM, Low level premutation and gray zone mosaicism                                                                                                                                                  |
| 13      | F   | 30, 118 and >200 repeats          | 5.2 kb and 2.8 kb and additional smear of 3.2 kb to 3.5 kb                                                                                                                                                                                         |
| 14      | M   | 71, 129 and >200 repeats          | 6-10 kb and additional bands of 3 and 3.2 kb                                                                                                                                                                                                       |
| 15      | M   | 28, >200 repeats                  |                                                                                                                                                                                                                                                    |
| 16      | F   | 22, 149, and >200 repeats         |                                                                                                                                                                                                                                                    |
| 17      | M   | 51, >200 repeats                  |                                                                                                                                                                                                                                                    |
| 18      | M   | 100, >200 repeats                 | 8 kb and an additional light band of 2.9 kb; fragile X amplification mutation in the form of a fully methylated full mutation with mosaicism for a premutation                                                                                     |
| 19      | M   | 133, 184, and >200 repeats        | 6 kb and 3.3-3.4 kb; fragile X amplification mutation in the form of a fully methylated full mutation with mosaicism for a premutation. The premutation is unmethylated                                                                            |

|    |   |                            |                                                                                                                                                                                              |
|----|---|----------------------------|----------------------------------------------------------------------------------------------------------------------------------------------------------------------------------------------|
| 20 | M | 168, 177, and >200 repeats | 5.8-7.5 kb and a band of 3.3 kb; fragile X amplification mutation in the form of a fully methylated full mutation with mosaicism for a premutation                                           |
| 21 | M | 120, 186, and >200 repeats |                                                                                                                                                                                              |
| 22 | M | 199, >200                  |                                                                                                                                                                                              |
| 23 | M | 43, >200 repeats           |                                                                                                                                                                                              |
| 24 | M | 100, >200 repeats          | 8-8.5 kb and bands of 6 kb, 3.3 kb, 3 kb; fragile X amplification mutation in the form of a fully methylated full mutation with mosaicism for a premutation. The premutation is unmethylated |
| 25 | M | 76, >200 repeats           |                                                                                                                                                                                              |
| 26 | M | 59, >200 repeats           |                                                                                                                                                                                              |
| 27 | M | 65, >200 repeats           |                                                                                                                                                                                              |
| 28 | M | 30, 195, and >200 repeats  |                                                                                                                                                                                              |
| 29 | M | 180, >200 repeats          |                                                                                                                                                                                              |
